# Supplementary material for: The Relation between Resistin (−420C/G) Single Nucleotide Variant, Resistin Serum Concentration, Carbohydrate, and Lipid Parameters and Fried Food Taste Preference in Patients with Hypertriglyceridemia
Source: MDPI journal article supplement (doi:10.3390/nu14235092), 2022-12-01
Supplement: s1 [file s1]

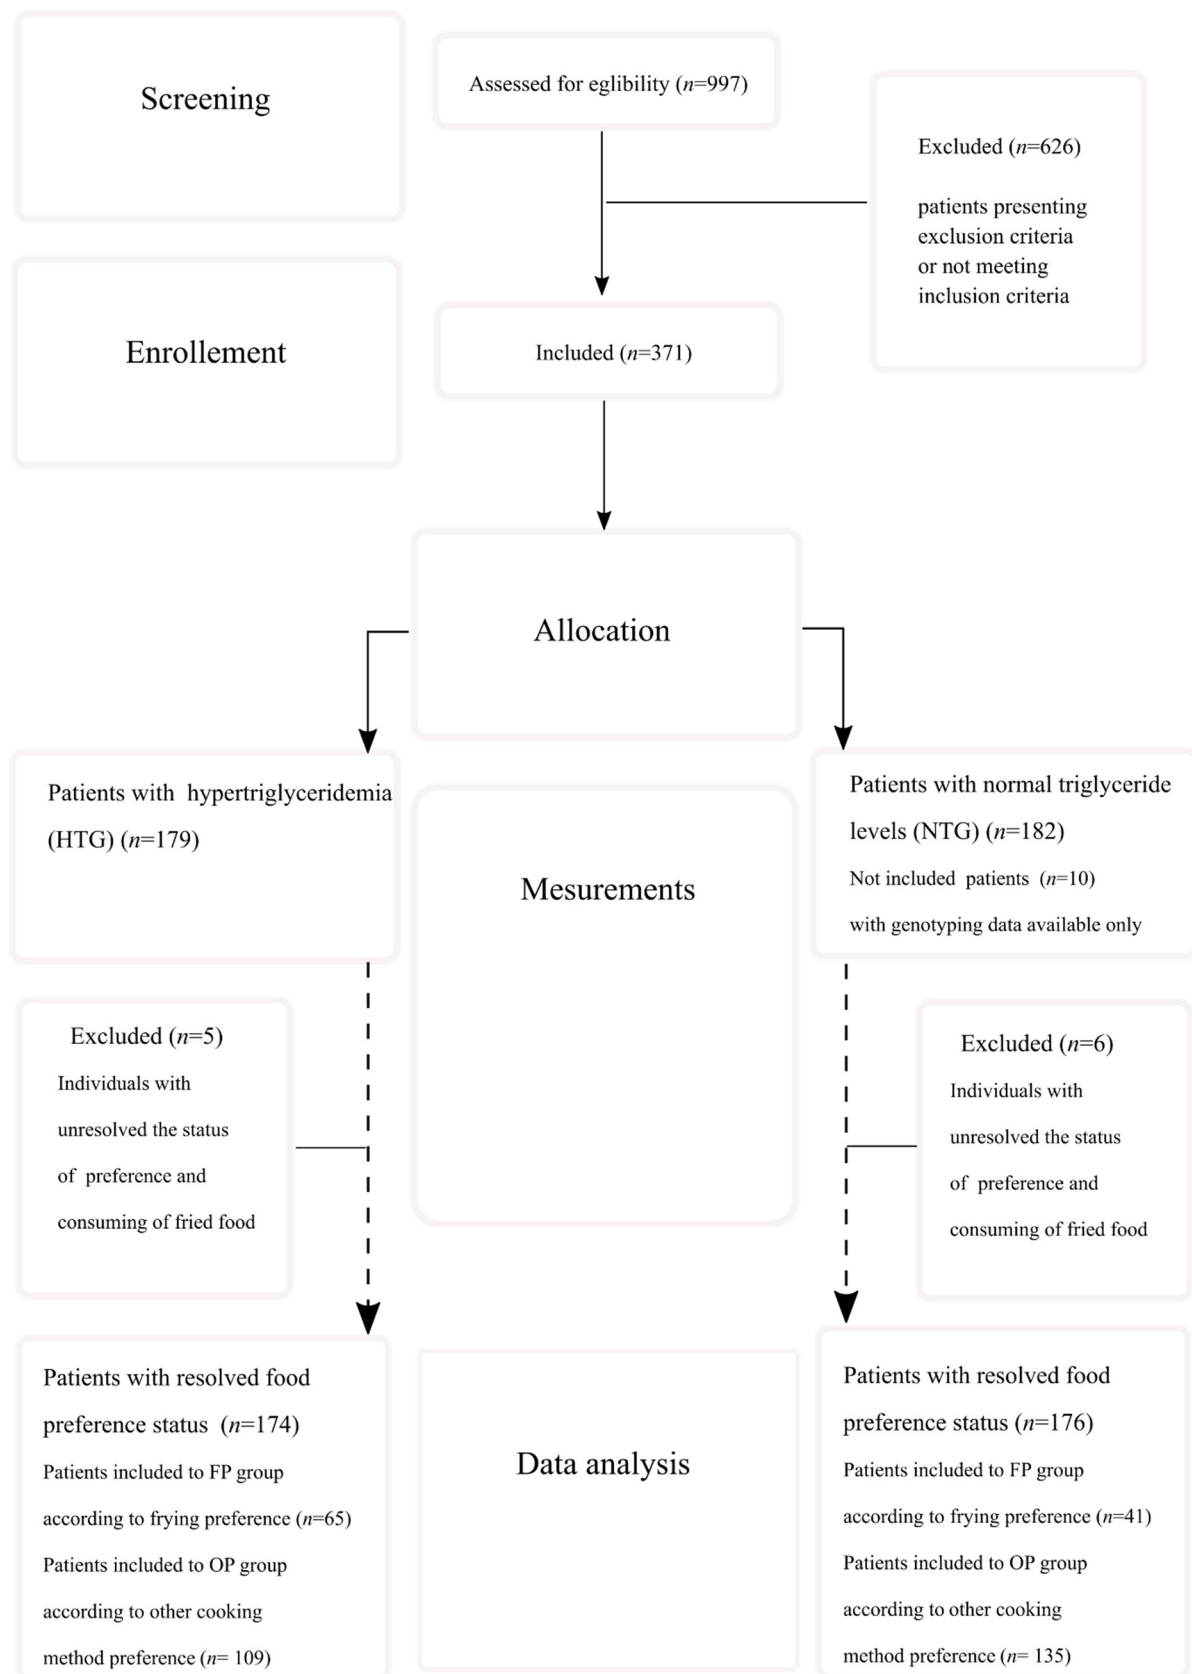

**Figure S1.** Flow diagram of the study.

HTG: hypertriglyceridemia; NTG: normotriglyceridemia; FP: frying preference; OP: other cooking preferences

**Table S1.** Multivariable logistic regression models estimated to evaluate the risk of hypertriglyceridemia in relation to the studied resistin variant

| Model 1                   |        |             |           |             |             |       |
|---------------------------|--------|-------------|-----------|-------------|-------------|-------|
| variables                 | raw OR | 95%CI       | p         | adjusted OR | 95%CI       | p     |
| sex                       |        |             |           |             |             |       |
| female                    |        |             | reference |             |             |       |
| male                      | 1.693  | 1.096-2.615 | 0.018     | 2.088       | 1.246-3.498 | 0.005 |
| genotype                  |        |             |           |             |             |       |
| CC                        |        |             | reference |             |             |       |
| CG+GG                     | 1.296  | 0.860-1.952 | 0.216     | 1.747       | 1.085-2.812 | 0.022 |
| BMI                       | 0.977  | 0.932-1.025 | 0.342     | 0.962       | 0.911-1.016 | 0.167 |
| age                       | 1.017  | 0.999-1.036 | 0.065     | 1.016       | 0.995-1.036 | 0.129 |
| Model 2                   |        |             |           |             |             |       |
| sex                       |        |             |           |             |             |       |
| female                    |        |             | reference |             |             |       |
| male                      | 1.693  | 1.096-2.615 | 0.018     | 1.604       | 0.999-2.575 | 0.055 |
| genotype                  |        |             |           |             |             |       |
| CC                        |        |             | reference |             |             |       |
| CG                        | 1.391  | 0.899-2.152 | 0.139     | 1.718       | 1.056-2.795 | 0.029 |
| GG                        | 1.152  | 0.599-2.216 | 0.672     | 1.078       | 0.538-2.162 | 0.832 |
| fried food preference     | 2.006  | 1.262-3.187 | 0.003     | 1.954       | 1.188-3.212 | 0.008 |
| total cholesterol [mg/dL] | 1.003  | 1.003-1.007 | 0.061     | 1.004       | 1.000-1.007 | 0.063 |
| Model 3                   |        |             |           |             |             |       |
| sex                       |        |             |           |             |             |       |
| female                    |        |             | reference |             |             |       |
| male                      | 1.693  | 1.096-2.615 | 0.018     | 2.483       | 1.353-4.559 | 0.003 |
| genotype                  |        |             |           |             |             |       |
| CC                        |        |             | reference |             |             |       |
| CG                        | 1.391  | 0.899-2.152 | 0.139     | 1.930       | 1.053-3.538 | 0.033 |
| GG                        | 1.152  | 0.599-2.216 | 0.672     | 1.118       | 0.467-2.675 | 0.802 |
| fried food preference     | 2.006  | 1.262-3.187 | 0.003     | 1.464       | 0.811-2.643 | 0.205 |
| HOMA-IR                   | 1.165  | 0.055-0.997 | 0.055     | 1.246       | 1.010-1.537 | 0.040 |
| total cholesterol [mg/dL] | 1.003  | 1.003-1.007 | 0.061     | 1.003       | 0.999-1.007 | 0.135 |

HOMA-IR: homeostatic model assessment-insulin resistance; BMI: body mass index; p—statistical significance; OR—odds ratio; CI- confidence interval.
